# Supplementary material for: Characteristics of a transgender and gender-diverse patient population in Utah: Use of electronic health records to advance clinical and health equity research
Source: PubMed Central journal article supplement (PMC11075904; doi:10.1371/journal.pone.0302895), 2024-05-07

# PLOS ONE

## Characteristics of a transgender and gender-diverse patient population in Utah: Use of electronic health records to advance clinical and health equity research --Manuscript Draft--

|                                |                                                                                                                                                                                                                                                                                                                                                                                                                                                                                                                                                                                                                                                                                                                                                                                                                                                                                                                                                                                                                                                                                                                                                                                                                                                                                                                                                                                                                                                                                                                                                                                                                                                        |
|--------------------------------|--------------------------------------------------------------------------------------------------------------------------------------------------------------------------------------------------------------------------------------------------------------------------------------------------------------------------------------------------------------------------------------------------------------------------------------------------------------------------------------------------------------------------------------------------------------------------------------------------------------------------------------------------------------------------------------------------------------------------------------------------------------------------------------------------------------------------------------------------------------------------------------------------------------------------------------------------------------------------------------------------------------------------------------------------------------------------------------------------------------------------------------------------------------------------------------------------------------------------------------------------------------------------------------------------------------------------------------------------------------------------------------------------------------------------------------------------------------------------------------------------------------------------------------------------------------------------------------------------------------------------------------------------------|
| <b>Manuscript Number:</b>      | PONE-D-23-40640                                                                                                                                                                                                                                                                                                                                                                                                                                                                                                                                                                                                                                                                                                                                                                                                                                                                                                                                                                                                                                                                                                                                                                                                                                                                                                                                                                                                                                                                                                                                                                                                                                        |
| <b>Article Type:</b>           | Research Article                                                                                                                                                                                                                                                                                                                                                                                                                                                                                                                                                                                                                                                                                                                                                                                                                                                                                                                                                                                                                                                                                                                                                                                                                                                                                                                                                                                                                                                                                                                                                                                                                                       |
| <b>Full Title:</b>             | Characteristics of a transgender and gender-diverse patient population in Utah: Use of electronic health records to advance clinical and health equity research                                                                                                                                                                                                                                                                                                                                                                                                                                                                                                                                                                                                                                                                                                                                                                                                                                                                                                                                                                                                                                                                                                                                                                                                                                                                                                                                                                                                                                                                                        |
| <b>Short Title:</b>            | Using electronic health records to identify transgender and gender diverse adults                                                                                                                                                                                                                                                                                                                                                                                                                                                                                                                                                                                                                                                                                                                                                                                                                                                                                                                                                                                                                                                                                                                                                                                                                                                                                                                                                                                                                                                                                                                                                                      |
| <b>Corresponding Author:</b>   | TIFFANY HO, MD, MPH<br>The University of Utah School of Medicine<br>Salt Lake City, UT UNITED STATES                                                                                                                                                                                                                                                                                                                                                                                                                                                                                                                                                                                                                                                                                                                                                                                                                                                                                                                                                                                                                                                                                                                                                                                                                                                                                                                                                                                                                                                                                                                                                   |
| <b>Keywords:</b>               | Transgender Care; Sexual and Gender Minority; gender identity; Gender-Affirming Care; Gender-Affirming Hormone Therapy; Gender Affirming Surgery; Electronic Health Record; administrative data; Retrospective Cohort Analysis; Health Equity                                                                                                                                                                                                                                                                                                                                                                                                                                                                                                                                                                                                                                                                                                                                                                                                                                                                                                                                                                                                                                                                                                                                                                                                                                                                                                                                                                                                          |
| <b>Abstract:</b>               | <p>Transgender and gender-diverse (TGD) people, individuals whose gender identity differs from their sex assigned at birth, face unique challenges in accessing gender-affirming care and often experience disparities in a variety of health outcomes. Clinical research on TGD health is limited by a lack of standardization on how to best identify these individuals. The objective of this retrospective cohort analysis was to accurately identify and describe TGD adults and their use of gender-affirming care from 2003 – 2023 in a healthcare system in Utah, United States. International Classification of Disease (ICD)-9 and 10 codes and surgical procedure codes, along with sexual orientation and gender identity data were used to develop a dataset of 4,764 TGD adults. During this time frame, 2,995 adults have received gender-affirming hormone therapy (GAHT) and/or gender-affirming surgery (GAS) within one healthcare system. There was no significant difference in race or ethnicity between TGD adults who received GAHT and/or GAS compared to TGD adults who did not receive such care. TGD adults who received GAHT and/or GAS were more likely to have commercial insurance coverage, and adults from rural communities were underrepresented. Patients seeking estradiol-based GAHT tended to be older than those seeking testosterone-based GAHT. The first GAS occurred in 2013, and uptake of GAS have doubled since 2018. This study provides a methodology to identify and examine TGD patients in other health systems and offers insights into emerging trends and access to gender-affirming care.</p> |
| <b>Order of Authors:</b>       | TIFFANY HO, MD, MPH<br>Brian Zenger, MD, PhD<br>Bayarmaa Mark, PhD<br>Laurel Hiatt<br>Erika Sullivan, MD, MS, MS<br>Benjamin A Steinberg, MD, MHS, FACP, FACC, FHRS<br>Ann Lyons<br>Adam M Spivak<br>Cori Agarwal<br>Marisa Adelman<br>James Hotaling<br>Bernadette Kiraly<br>Sharon Talboys                                                                                                                                                                                                                                                                                                                                                                                                                                                                                                                                                                                                                                                                                                                                                                                                                                                                                                                                                                                                                                                                                                                                                                                                                                                                                                                                                           |
| <b>Additional Information:</b> |                                                                                                                                                                                                                                                                                                                                                                                                                                                                                                                                                                                                                                                                                                                                                                                                                                                                                                                                                                                                                                                                                                                                                                                                                                                                                                                                                                                                                                                                                                                                                                                                                                                        |

| Question                                                                                                                                                                                                                                                                                                                                                                                                                                                                                                                                                                                                                                                                                                                                                                                                                                                                                                                                                                                                                             | Response                                                                                                                                                                                                                                                                                                                                                                                                                                                                                                                                                                                                                                                          |
|--------------------------------------------------------------------------------------------------------------------------------------------------------------------------------------------------------------------------------------------------------------------------------------------------------------------------------------------------------------------------------------------------------------------------------------------------------------------------------------------------------------------------------------------------------------------------------------------------------------------------------------------------------------------------------------------------------------------------------------------------------------------------------------------------------------------------------------------------------------------------------------------------------------------------------------------------------------------------------------------------------------------------------------|-------------------------------------------------------------------------------------------------------------------------------------------------------------------------------------------------------------------------------------------------------------------------------------------------------------------------------------------------------------------------------------------------------------------------------------------------------------------------------------------------------------------------------------------------------------------------------------------------------------------------------------------------------------------|
| <p><b>Financial Disclosure</b></p> <p>Enter a financial disclosure statement that describes the sources of funding for the work included in this submission. Review the <a href="#">submission guidelines</a> for detailed requirements. View published research articles from <a href="#">PLOS ONE</a> for specific examples.</p> <p>This statement is required for submission and <b>will appear in the published article</b> if the submission is accepted. Please make sure it is accurate.</p> <p><b>Funded studies</b></p> <p>Enter a statement with the following details:</p> <ul style="list-style-type: none"> <li>• Initials of the authors who received each award</li> <li>• Grant numbers awarded to each author</li> <li>• The full name of each funder</li> <li>• URL of each funder website</li> <li>• Did the sponsors or funders play any role in the study design, data collection and analysis, decision to publish, or preparation of the manuscript?</li> </ul> <p>Did you receive funding for this work?</p> | <p>Yes</p>                                                                                                                                                                                                                                                                                                                                                                                                                                                                                                                                                                                                                                                        |
| <p>Please add funding details. as follow-up to "<b>Financial Disclosure</b></p> <p>Enter a financial disclosure statement that describes the sources of funding for the work included in this submission. Review the <a href="#">submission guidelines</a> for detailed requirements. View published research articles from <a href="#">PLOS ONE</a> for specific examples.</p> <p>This statement is required for submission and <b>will appear in the published article</b> if the submission is accepted. Please make sure it is accurate.</p>                                                                                                                                                                                                                                                                                                                                                                                                                                                                                     | <p>(ES and TH) This study was supported by the University of Utah Department of Family and Preventive Medicine, Health Studies Fund, Research Pilot Award. The funders had no role in study design, data collection and analysis, decision to publish, or preparation of the manuscript.</p> <p>(BZ) This study was partially supported by the National Institute of Health (NIH) National Heart, Lung, and Blood Institute ( NHLBI) Grant no. 1F30HL149327 <a href="https://www.nhlbi.nih.gov/">https://www.nhlbi.nih.gov/</a> The funders had no role in study design, data collection and analysis, decision to publish, or preparation of the manuscript.</p> |

|                                                                                                                                                                                                                                                                                                                                                                                                                                                                                                                                                                                                                                                                                                                                                                                                                                                                                                                                                                                                                                                                                                                                                                                                  |                                                                     |
|--------------------------------------------------------------------------------------------------------------------------------------------------------------------------------------------------------------------------------------------------------------------------------------------------------------------------------------------------------------------------------------------------------------------------------------------------------------------------------------------------------------------------------------------------------------------------------------------------------------------------------------------------------------------------------------------------------------------------------------------------------------------------------------------------------------------------------------------------------------------------------------------------------------------------------------------------------------------------------------------------------------------------------------------------------------------------------------------------------------------------------------------------------------------------------------------------|---------------------------------------------------------------------|
| <p><b>Funded studies</b></p> <p>Enter a statement with the following details:</p> <ul style="list-style-type: none"> <li>• Initials of the authors who received each award</li> <li>• Grant numbers awarded to each author</li> <li>• The full name of each funder</li> <li>• URL of each funder website</li> <li>• Did the sponsors or funders play any role in the study design, data collection and analysis, decision to publish, or preparation of the manuscript?</li> </ul> <p>Did you receive funding for this work?"</p>                                                                                                                                                                                                                                                                                                                                                                                                                                                                                                                                                                                                                                                                |                                                                     |
| <p>Please select the country of your main research funder (please select carefully as in some cases this is used in fee calculation).</p> <p>as follow-up to "<b>Financial Disclosure</b></p> <p>Enter a financial disclosure statement that describes the sources of funding for the work included in this submission. Review the <a href="#">submission guidelines</a> for detailed requirements. View published research articles from <a href="#">PLOS ONE</a> for specific examples.</p> <p>This statement is required for submission and <b>will appear in the published article</b> if the submission is accepted. Please make sure it is accurate.</p> <p><b>Funded studies</b></p> <p>Enter a statement with the following details:</p> <ul style="list-style-type: none"> <li>• Initials of the authors who received each award</li> <li>• Grant numbers awarded to each author</li> <li>• The full name of each funder</li> <li>• URL of each funder website</li> <li>• Did the sponsors or funders play any role in the study design, data collection and analysis, decision to publish, or preparation of the manuscript?</li> </ul> <p>Did you receive funding for this work?"</p> | <p>UNITED STATES - US</p>                                           |
| <p><b>Competing Interests</b></p>                                                                                                                                                                                                                                                                                                                                                                                                                                                                                                                                                                                                                                                                                                                                                                                                                                                                                                                                                                                                                                                                                                                                                                | <p>The authors have declared that no competing interests exist.</p> |

Use the instructions below to enter a competing interest statement for this submission. On behalf of all authors, disclose any [competing interests](#) that could be perceived to bias this work—acknowledging all financial support and any other relevant financial or non-financial competing interests.

This statement is **required** for submission and **will appear in the published article** if the submission is accepted. Please make sure it is accurate and that any funding sources listed in your Funding Information later in the submission form are also declared in your Financial Disclosure statement.

View published research articles from [PLOS ONE](#) for specific examples.

#### **NO authors have competing interests**

Enter: *The authors have declared that no competing interests exist.*

#### **Authors with competing interests**

Enter competing interest details beginning with this statement:

*I have read the journal's policy and the authors of this manuscript have the following competing interests: [insert competing interests here]*

\* typeset

#### **Ethics Statement**

Enter an ethics statement for this submission. This statement is required if the study involved:

- Human participants
- Human specimens or tissue
- Vertebrate animals or cephalopods
- Vertebrate embryos or tissues

Approved by the University of Utah Institutional Review Board (Umbrella IRB\_00161271)

Consent was not obtained as this was a retrospective chart review, participants were not contacted for this study and data was analyzed anonymously

- Field research

Write "N/A" if the submission does not require an ethics statement.

General guidance is provided below. Consult the [submission guidelines](#) for detailed instructions. **Make sure that all information entered here is included in the Methods section of the manuscript.**

**Format for specific study types**

**Human Subject Research (involving human participants and/or tissue)**

- Give the name of the institutional review board or ethics committee that approved the study
- Include the approval number and/or a statement indicating approval of this research
- Indicate the form of consent obtained (written/oral) or the reason that consent was not obtained (e.g. the data were analyzed anonymously)

**Animal Research (involving vertebrate animals, embryos or tissues)**

- Provide the name of the Institutional Animal Care and Use Committee (IACUC) or other relevant ethics board that reviewed the study protocol, and indicate whether they approved this research or granted a formal waiver of ethical approval
- Include an approval number if one was obtained
- If the study involved *non-human primates*, add *additional details* about animal welfare and steps taken to ameliorate suffering
- If anesthesia, euthanasia, or any kind of animal sacrifice is part of the study, include briefly which substances and/or methods were applied

**Field Research**

Include the following details if this study involves the collection of plant, animal, or other materials from a natural setting:

- Field permit number
- Name of the institution or relevant body that granted permission

**Data Availability**

Authors are required to make all data underlying the findings described fully available, without restriction, and from the time of publication. PLOS allows rare exceptions to address legal and ethical concerns. See the [PLOS Data Policy](#) and [FAQ](#) for detailed information.

No - some restrictions will apply

A Data Availability Statement describing where the data can be found is required at submission. Your answers to this question constitute the Data Availability Statement and **will be published in the article**, if accepted.

**Important:** Stating 'data available on request from the author' is not sufficient. If your data are only available upon request, select 'No' for the first question and explain your exceptional situation in the text box.

Do the authors confirm that all data underlying the findings described in their manuscript are fully available without restriction?

**Describe where the data may be found in full sentences. If you are copying our sample text, replace any instances of XXX with the appropriate details.**

- If the data are **held or will be held in a public repository**, include URLs, accession numbers or DOIs. If this information will only be available after acceptance, indicate this by ticking the box below. For example: *All XXX files are available from the XXX database (accession number(s) XXX, XXX).*
- If the data are all contained **within the manuscript and/or Supporting Information files**, enter the following: *All relevant data are within the manuscript and its Supporting Information files.*
- If neither of these applies but you are able to provide **details of access elsewhere**, with or without limitations, please do so. For example:

*Data cannot be shared publicly because of [XXX]. Data are available from the XXX Institutional Data Access / Ethics Committee (contact via XXX) for researchers who meet the criteria for access to confidential data.*

*The data underlying the results presented in the study are available from (include the name of the third party*

The information will only be available after acceptance.

Data cannot be shared publicly because of concern for current legislation in the state of Utah that may ban gender-affirming care and they may utilize this information to target specific individuals (the dataset uses zip code which can be identifiable). Data are available from the University of Utah Institutional Data Access / Ethics Committee (contact via corresponding author Tiffany Ho) for researchers who meet the criteria for access to confidential data.

|                                                                                                                                                                                                                                         |                                                                                                                                                                                  |
|-----------------------------------------------------------------------------------------------------------------------------------------------------------------------------------------------------------------------------------------|----------------------------------------------------------------------------------------------------------------------------------------------------------------------------------|
| <p><i>and contact information or URL).</i></p> <ul style="list-style-type: none"><li>• This text is appropriate if the data are owned by a third party and authors do not have permission to share the data.</li></ul> <p>* typeset</p> |                                                                                                                                                                                  |
| Additional data availability information:                                                                                                                                                                                               | Tick here if the URLs/accession numbers/DOIs will be available only after acceptance of the manuscript for publication so that we can ensure their inclusion before publication. |



1 Characteristics of a transgender and gender-diverse patient population in Utah: Use of electronic  
2 health records to advance clinical and health equity research

3  
4 Tiffany Ho<sup>1\*</sup>, Brian Zenger<sup>2</sup>, Bayarmaa Mark<sup>1</sup>, Laurel Hiatt<sup>3</sup>, Erika Sullivan<sup>1</sup>, Benjamin A.  
5 Steinberg<sup>4</sup>, Ann Lyons<sup>5</sup>, Adam M. Spivak<sup>6</sup>, Cori Agarwal<sup>7</sup>, Marisa Adelman<sup>8</sup>, James Hotaling<sup>9</sup>,  
6 Bernadette Kiraly<sup>1</sup>, Sharon Talboys<sup>1</sup>

7 <sup>1</sup> Department of Family and Preventive Medicine, University of Utah School of Medicine, Salt  
8 Lake City, Utah, United States of America

9  
10 <sup>2</sup> Department of Internal Medicine, Washington University in St. Louis, St. Louis, Missouri,  
11 United States of America

12  
13 <sup>3</sup> Department of Human Genetics, University of Utah, Salt Lake City, Utah, United States of  
14 America

15  
16 <sup>4</sup> Division of Cardiology, University of Utah School of Medicine, Salt Lake City, Utah, United  
17 States of America

18  
19 <sup>5</sup> Data Science Services, University of Utah, Salt Lake City, Utah, United States of America

20  
21 <sup>6</sup> Division of Infectious Diseases, University of Utah School of Medicine, Salt Lake City, Utah,  
22 United States of America

23  
24 <sup>7</sup> Division of Plastic Surgery, Department of Surgery, University of Utah, Salt Lake City, Utah,  
25 United States of America

26  
27 <sup>8</sup> Department of Obstetrics & Gynecology, University of Utah, Salt Lake City, Utah, United  
28 States of America

29  
30 <sup>9</sup> Division of Urology, Department of Surgery, University of Utah, Salt Lake City, Utah, United  
31 States of America

32  
33  
34 \* Corresponding author

35 Email: [tiffany.ho@hsc.utah.edu](mailto:tiffany.ho@hsc.utah.edu) (TH)

36

37 **Abstract**

38 Transgender and gender-diverse (TGD) people, individuals whose gender identity differs from  
39 their sex assigned at birth, face unique challenges in accessing gender-affirming care and often  
40 experience disparities in a variety of health outcomes. Clinical research on TGD health is limited  
41 by a lack of standardization on how to best identify these individuals. The objective of this  
42 retrospective cohort analysis was to accurately identify and describe TGD adults and their use of  
43 gender-affirming care from 2003 – 2023 in a healthcare system in Utah, United States.  
44 International Classification of Disease (ICD)-9 and 10 codes and surgical procedure codes, along  
45 with sexual orientation and gender identity data were used to develop a dataset of 4,764 TGD  
46 adults. During this time frame, 2,995 adults have received gender-affirming hormone therapy  
47 (GAHT) and/or gender-affirming surgery (GAS) within one healthcare system. There was no  
48 significant difference in race or ethnicity between TGD adults who received GAHT and/or GAS  
49 compared to TGD adults who did not receive such care. TGD adults who received GAHT and/or  
50 GAS were more likely to have commercial insurance coverage, and adults from rural  
51 communities were underrepresented. Patients seeking estradiol-based GAHT tended to be older  
52 than those seeking testosterone-based GAHT. The first GAS occurred in 2013, and uptake of  
53 GAS have doubled since 2018. This study provides a methodology to identify and examine TGD  
54 patients in other health systems and offers insights into emerging trends and access to gender-  
55 affirming care.

56

57

## 58 **Introduction**

59 In recent years, there is increasing recognition of the unique healthcare needs of transgender and  
60 gender-diverse (TGD) individuals. In the World Professional Association of Transgender Health  
61 (WPATH) Standards of Care for Transgender and Gender Diverse People, Version 8 [1] offers a  
62 broad and comprehensive description of people with gender identities or expressions that differ  
63 from the gender socially attributed to their sex assigned to them at birth. Estimates of the size of  
64 this population vary, but recent studies suggest that approximately 0.6-1% of the general  
65 population identifies as TGD [2–4]. As this population seeks healthcare services, it is imperative  
66 that research focuses on addressing their specific needs to provide effective, evidence-based care.

67 Based on small studies with limited datasets, the TGD community experiences more  
68 discrimination in the healthcare system than the general population [5,6], and this stigma drives  
69 health disparities [5,7]. Transgender and gender-diverse people have higher rates of mental  
70 health conditions (anxiety, depression, suicidality, post-traumatic stress disorder) [8–10],  
71 substance use disorder [11,12], infectious diseases including HIV/AIDS [13–15] among many  
72 other health concerns. These health disparities arise from a complex interplay of factors,  
73 including minority stress, stigma, discrimination, barriers to accessing care, and a lack of  
74 provider knowledge and cultural competency [7,16–18]. Many studies on this population rely on  
75 small sample sizes [19–21], convenience sampling [2,22–24], or large administrative databases  
76 with limited clinical detail [4,25,26] resulting in limited generalizability of findings. Moreover,  
77 most of the TGD health research to date has been qualitative or cross-sectional in nature, lacking  
78 longitudinal data that could provide insights into the long-term health outcomes and care  
79 trajectories of TGD adults.

80 Given the increased visibility of TGD experience in the past ten years, it is of critical importance  
81 to identify the health needs of TGD individuals particularly in the lens of medical management.  
82 The objectives of this study were to characterize the community of TGD adults who received  
83 clinical care at a large healthcare system in Utah and to explore the rates of TGD adults who  
84 receive gender-affirming hormone-therapy (GAHT) and/or gender-affirming surgeries (GAS).  
85 The goal of this manuscript is to share the methodology of creating this cohort so others can  
86 apply and improve upon this method to advance understanding of important clinical and health  
87 equity questions in the field of transgender health.

## 88 **Methods**

89 This retrospective cohort study examined clinical encounter data from a Utah-based healthcare  
90 system for individuals over the age of 18 years old seeking gender-affirming care. Clinical and  
91 administrative billing diagnosis encounters between 2003 –April 2023 were used to determine  
92 the base cohort. Inpatient, outpatient, and procedural visits, as well as medication orders and  
93 laboratory results relevant to gender-affirming care were also retrieved. The data was derived  
94 from the health system’s enterprise data warehouse upon approval by the University of Utah’s  
95 Institutional Review Board (IRB\_00159449).

96 The diagnostic **International Classification of Disease (ICD) version 9 and 10 codes specific for**  
97 **“gender dysphoria,” and TGD adults were selected based on methodology described in earlier**  
98 **studies [27–30].** Adults aged 18 years and older were included in the dataset if they had at least  
99 one clinical encounter that billed specific codes commonly associated with TGD individuals  
100 (table 1).

101

102 Table 1: ICD-9 and ICD-10 codes used to identify potentially eligible transgender and gender-  
 103 diverse adults for cohort  
 104

| ICD-9 Diagnostic Code |                                                                                                 | ICD-10 Diagnostic Code |                                       |
|-----------------------|-------------------------------------------------------------------------------------------------|------------------------|---------------------------------------|
| 301.50                | Trans-sexualism with unspecified sexual history (aka ‘trans-sexualism not otherwise specified’) | F64.0                  | Transsexualism                        |
| 302.51                | Trans-sexualism with asexual history                                                            | F64.1                  | Dual role transvestism                |
| 302.52                | Trans-sexualism with homosexual history                                                         | F64.2                  | Gender identity disorder of childhood |
| 302.53                | Trans-sexualism with heterosexual history                                                       | F64.8                  | Other gender identity disorders       |
| 302.6                 | Gender identity disorder in children                                                            | F64.9                  | Gender identity disorder unspecified  |
| 302.85                | Gender identity disorder in adolescents or adults                                               | Z87.890                | Personal history of sex reassignment  |

105

106 Surgical procedures were identified based on the Current Procedural Terminology (CPT) codes  
 107 associated with GAS as listed in table 2. These codes were collected from both literature review  
 108 [31,32] and from the surgeons who performed gender-affirming surgeries within one Utah-based  
 109 healthcare system.

110 Table 2: Current Procedural Terminology (CPT) codes used for gender-affirming surgeries

| Gender-Affirming Surgical Procedures | Top                                                             | Bottom                                                                                                                                                             |
|--------------------------------------|-----------------------------------------------------------------|--------------------------------------------------------------------------------------------------------------------------------------------------------------------|
| Feminizing                           | <i>Chest Wall Reconstruction (breast augmentation)</i><br>19325 | <i>Orchiectomy</i> [32]<br>54520,54521,54522,54530,54535<br><br><i>Vaginoplasty</i><br>53420, 53430, 54125, 54520, 54690, 55970, 56800, 56805, 57291, 57292, 57335 |

|                      |                                                                                                       |                                                                                                                                                                                                                                                                                                                                                                                                                                                                                                                                                   |
|----------------------|-------------------------------------------------------------------------------------------------------|---------------------------------------------------------------------------------------------------------------------------------------------------------------------------------------------------------------------------------------------------------------------------------------------------------------------------------------------------------------------------------------------------------------------------------------------------------------------------------------------------------------------------------------------------|
| <p>Masculinizing</p> | <p><i>Chest Wall Reconstruction (bilateral mastectomies)</i></p> <p>19300,19301,19303,19304,19318</p> | <p><i>Phalloplasty</i></p> <p>53425, 54660, 55175, 55180, 55980, 57106, 57110</p> <p><i>Oophorectomy</i></p> <p>57531, 58200, 58210, 58240, 58240, 58548, 58943, 58950, 58951, 58952, 58953, 58954, 58956, 58291, 58542, 58544, 58548, 58552, 58554, 58571, 58573, 58951, 58953, 58954, 58956, 58700</p> <p><i>Hysterectomy [31]</i></p> <p>58260, 58285, 58290, 58541, 58543, 58550, 58553, 58570, 5857, 58291, 58542, 58544, 58548, 58552, 58554, 58571, 58573, 58951, 58953, 58954, 58956, 56307, 56308, 58150, 58152, 58180, 58200, 58210</p> |
|----------------------|-------------------------------------------------------------------------------------------------------|---------------------------------------------------------------------------------------------------------------------------------------------------------------------------------------------------------------------------------------------------------------------------------------------------------------------------------------------------------------------------------------------------------------------------------------------------------------------------------------------------------------------------------------------------|

111

112 The accuracy of the TGD cohort was verified via a random sample of 50 patients selected based

113 on ICD codes with 100% accuracy. Furthermore, a random sample of 50 known TGD adults

114 were selected from an outpatient clinic list and 100% of the known TGD adults appeared in the

115 ICD based selection. Due to discordance in the type of hormone therapy, gender-affirming

116 surgery and/or gender identity, manual chart review was completed for 101 TGD adults in the

117 GAHT group and 22 were excluded as they did not meet the criteria for TGD. Thirty-nine adults

118 had prescriptions for both testosterone- and estrogen-based therapy. Of those, five were excluded

119 as they did not meet the criteria for TGD (all postmenopausal cis-women on hormone

120 replacement therapy), four adults had detransitioned back to their natal sex, and one adult had

121 active prescriptions for both injectable testosterone and oral estradiol. To reduce mis-  
122 categorization for gender-affirming surgeries, manual chart review was performed for 93 adults  
123 who had surgery types that were either incongruent with each other or with the category of  
124 GAHT (e.g. individual with hysterectomy who was also on estrogen due to endometrial cancer).  
125 Thirteen adults from the GAS group were excluded as they did not meet the criteria for TGD.

126 **Metrics**

127 Transgender and gender-diverse adults were categorized into three groups: those who underwent  
128 GAS; those actively managed on GAHT; and those who had the ICD-9 or -10 diagnosis of  
129 gender dysphoria but had not undergone active medical therapy or surgical intervention (not  
130 actively managed). The specific inclusion criteria for each group are shown in table 3. Of note,  
131 the first two groups are not exclusive of each other. Adults who had any prescription for GAHT  
132 were categorized as estrogen-based or testosterone-based hormone therapy (supplemental table  
133 1). The type of hormone was used to define the broader categories instead of transfeminine and  
134 transmasculine to be inclusive of non-binary and gender-diverse adults. Considering that some of  
135 these individuals may be receiving active hormone therapy outside of our healthcare system,  
136 adults were not included in the actively managed group if they had less than two prescriptions at  
137 different dates confirmed within the health system. Thus, adults with two or more unique  
138 prescriptions were considered actively managed for GAHT (Figure 1).

139

140 Table 3. Inclusion Criteria for Gender Affirming Hormone Therapy (GAHT) and Gender-  
141 Affirming Surgery Groups

142

| Study Group | Inclusion Criteria |
|-------------|--------------------|
|-------------|--------------------|

|                                          |                                                                                                                                                                                                    |
|------------------------------------------|----------------------------------------------------------------------------------------------------------------------------------------------------------------------------------------------------|
| General Testosterone-based GAHT          | Adults with at least one prescription for testosterone                                                                                                                                             |
| General Estrogen-based GAHT              | Adults with at least one prescription for estrogen                                                                                                                                                 |
| Actively Managed Testosterone-based GAHT | Two or more prescriptions of testosterone, each at least one day apart                                                                                                                             |
| Active Managed Estrogen-based GAHT       | Two or more prescriptions of estrogen, each at least one day apart                                                                                                                                 |
| Gender-Affirming Surgery                 | Any gender affirming surgical interventions as defined in supplemental table 1                                                                                                                     |
| Not Actively Managed                     | Adults with the ICD-9 or ICD-10 code who have not received any medical therapy or surgical intervention. Includes adults who had less than 2 prescriptions of estrogen- or testosterone-based GAHT |

143

144 The index visit for the cohort was defined as the date of the first prescription of GAHT  
 145 prescribed in the health care system or date of the first GAS procedure. Of note, the earliest  
 146 index date for GAHT was in 2005 and earliest date for GAS was in 2013. For those who had not  
 147 undergone medical therapy or surgical treatment, no index date was assigned.

148 Gender-affirming surgeries were categorized as the following: bottom (i.e. vaginoplasty,  
 149 orchiectomy, phalloplasty, **hysterectomy**) or top (i.e. bilateral mastectomy, breast augmentation)  
 150 as well as feminizing or masculinizing.

151 Sexual orientation and gender identity (SOGI) data is based on patient self-report, while legal  
 152 sex (list here as EHR-reported sex) is based on government issued identification. This healthcare  
 153 system launched the SOGI data questionnaire in 2018 and only recently has had initiatives to  
 154 standardize and streamline collection of this data. Race and ethnicity were categorized based on



155 the options available in the electronic health record. Body mass index (BMI) was calculated in  
156 two ways: the first was a mean derived from the BMI before and closest to the index date and the  
157 second was the average of all BMIs prior to the index date. Patients' geographical information  
158 was also used and subset into rural, urban, and unknown based on zip code [33].

### 159 **Statistical Methods**

160 Descriptive statistics are reported as means (standard deviation) or frequencies (percentages).  
161 Chi-square and Student t-tests were used to compare the baseline demographics and  
162 comorbidities of the cohorts. Fisher's exact test was used when the Chi-square test was  
163 inadequate.

164 Data processing was performed using R (Version 3.6.3), RStudio (Version 1.2.5033), with  
165 appropriate packages. Statistical analysis was performed using R (Version 3.4.1), RStudio  
166 (Version 1.0.153). A two-sided test with a p-value of less than 0.05 was considered statistically  
167 significant. Analysis of the data collected as part of routine clinical care, and subsequent  
168 reporting of anonymized, aggregate data, was approved by the University of Utah Institutional  
169 Review Board (IRB\_00159449).

### 170 **Results**

171 Based on the methods specified in Figure 1, the study initially identified 4,807 unique adults who  
172 met the ICD-9 or -10 diagnosis of gender dysphoria within this Utah-based health care system  
173 from 2003-2023 (Figure 1). After cohort verification with manual chart review, 43 adults were  
174 excluded for a final cohort size of 4,764 TGD adults. From 2003 – 2023, 1,216 TGD adults had  
175 undergone at least one GAS, 1,779 had actively received GAHT without undergoing GAS and

176 1,769 were not actively managed (had not undergone active medical therapy or surgical  
 177 intervention).

178 Figure 1. Flow diagram of categorizing transgender and gender-diverse adults (2003-2023)

179 Table 4 compares the demographics of TGD adults who received GAHT and/or GAS versus  
 180 those not actively managed. There was no significant difference in race or ethnicity between the  
 181 two groups. Adults who underwent GAS and/or GAHT were more likely to have commercial  
 182 insurance (75.0% vs 62.6%) and less likely to have Medicaid (10.3% vs 13.8%), Medicare (3.9%  
 183 vs 9.7%) and unknown insurance (8.2% vs 11.3%) compared to adults who were not actively  
 184 managed. Adults who underwent GAS and/or GAHT were more likely to be from Utah (87.2%  
 185 vs 81.6%) and significantly higher percentage of people from urban areas (92.8% vs 89.5%).

186

187 Table 4. Demographics of transgender and gender-diverse adults undergoing gender-affirming  
 188 surgery and/or gender-affirming hormone therapy versus not actively managed

|                                  | Not Actively<br>Managed<br>(N=1769) <sup>a</sup> | Surgery and/or<br>hormone<br>(N=2995) | All<br>(N=4764) | p-value |
|----------------------------------|--------------------------------------------------|---------------------------------------|-----------------|---------|
| <b>Race</b>                      |                                                  |                                       |                 | 0.075   |
| White or Caucasian               | 1367 (86.3%)                                     | 2545 (87.1%)                          | 3912 (82.1%)    |         |
| Black or African American        | 35 (2.2%)                                        | 46 (1.6%)                             | 81 (1.7%)       |         |
| Asian                            | 20 (1.3%)                                        | 64 (2.2%)                             | 84 (1.8%)       |         |
| American Indian/Alaska<br>Native | 33 (2.1%)                                        | 42 (1.4%)                             | 75 (1.6%)       |         |
| Native Hawaiian/Pacific Islander | 12 (0.8%)                                        | 19 (0.7%)                             | 31 (0.7%)       |         |
| Other                            | 117 (7.4%)                                       | 207 (7.1%)                            | 324 (6.8%)      |         |
| Unknown race                     | 185 (-)                                          | 72 (-)                                | 257 (5.4%)      |         |
| <b>Ethnicity</b>                 |                                                  |                                       |                 | 0.533   |
| Hispanic/Latino                  | 152 (9.9%)                                       | 301 (10.5%)                           | 453 (9.5%)      |         |
| Not Hispanic/Latino              | 1391 (90.1%)                                     | 2566 (89.5%)                          | 3957 (83.1%)    |         |
| Unknown ethnicity                | 226 (-)                                          | 128 (-)                               | 354 (7.4%)      |         |
| <b>Marital status</b>            |                                                  |                                       |                 | <.001   |
| Married/Life partner             | 415 (26.4%)                                      | 612 (22.0%)                           | 1027 (21.6%)    |         |
| Divorced/Legally separated       | 85 (5.4%)                                        | 133 (4.8%)                            | 218 (4.6%)      |         |

|                           |              |              |              |       |
|---------------------------|--------------|--------------|--------------|-------|
| Widowed                   | 32 (2.0%)    | 13 (0.5%)    | 45 (0.9%)    |       |
| Single                    | 1042 (66.2%) | 2022 (72.7%) | 3064 (64.3%) |       |
| Unknown/Other             | 195 (-)      | 215 (-)      | 410 (8.6%)   |       |
| <b>Sex (EHR reported)</b> |              |              |              | 0.296 |
| Female                    | 963 (54.7%)  | 1576 (52.8%) | 2539 (53.3%) |       |
| Male                      | 789 (44.8%)  | 1384 (46.4%) | 2173 (45.6%) |       |
| Nonbinary                 | 9 (0.5%)     | 23 (0.8%)    | 32 (0.7%)    |       |
| Unknown sex               | 8 (-)        | 12 (-)       | 20 (0.4%)    |       |
| <b>Gender identity</b>    |              |              |              | <.001 |
| Female                    | 220 (12.4%)  | 379 (12.7%)  | 599 (12.6%)  |       |
| Male                      | 168 (9.5%)   | 266 (8.9%)   | 434 (9.1%)   |       |
| Transgender Female        | 220 (12.4%)  | 755 (25.2%)  | 975 (20.5%)  |       |
| Transgender Male          | 261 (14.8%)  | 685 (22.9%)  | 946 (19.9%)  |       |
| Non-binary                | 201 (11.4%)  | 336 (11.2%)  | 537 (11.3%)  |       |
| Unknown gender identity   | 699 (39.5%)  | 574 (19.2%)  | 1273 (26.7%) |       |
| <b>Insurance status</b>   |              |              |              | <.001 |
| Commercial                | 1108 (62.6%) | 2247 (75.0%) | 3355 (70.4%) |       |
| Medicaid                  | 245 (13.8%)  | 309 (10.3%)  | 554 (11.6%)  |       |
| Medicare                  | 171 (9.7%)   | 116 (3.9%)   | 287 (6.0%)   |       |
| Misc Government           | 45 (2.5%)    | 76 (2.5%)    | 121 (2.5%)   |       |
| Unknown insurance         | 200 (11.3%)  | 247 (8.2%)   | 447 (9.4%)   |       |
| <b>State</b>              |              |              |              | <.001 |
| Idaho                     | 126 (7.1%)   | 113 (3.8%)   | 239 (5.0%)   |       |
| Nevada                    | 44 (2.5%)    | 58 (1.9%)    | 102 (2.1%)   |       |
| Utah                      | 1442 (81.6%) | 2610 (87.2%) | 4052 (85.1%) |       |
| Wyoming                   | 27 (1.5%)    | 42 (1.4%)    | 69 (1.4%)    |       |
| Other states <sup>b</sup> | 129 (7.3%)   | 171 (5.7%)   | 300 (6.3%)   |       |
| Unknown state             | 1 (-)        | 1 (-)        | 2 (0.0%)     |       |
| <b>Rurality</b>           |              |              |              | <.001 |
| Urban                     | 1583 (89.5%) | 2777 (92.8%) | 4360 (91.5%) |       |
| Rural                     | 185 (10.5%)  | 217 (7.2%)   | 402 (8.4%)   |       |
| Unknown                   | 1 (-)        | 1 (-)        | 2 (0.0%)     |       |

189 <sup>a</sup>Missing values were not included when calculating the p-values (chi-square test is used to compare categories, t-  
190 test is used to compare means)

191 <sup>b</sup>Other state include: AZ, CA, CO, CT, DC, FL, HI, IA, IL, IN, MA, KY, MD, MI, MN, MO, MS, NC, ND, NE,  
192 NH, MT, NM, NY, OH, OK, OR, PA, SC, SD, TN, TX, VA, WA

193 The demographics of TGD adults who received GAHT without GAS was also compared to those  
194 who had undergone GAS (Table 5). The mean age at first index date prescription was 26.8 years  
195 old for GAHT and 29.8 years old for GAS (p<0.001). There was no significant difference  
196 between the two groups in terms of race or ethnicity. The mean BMI was lower for the actively

197 managed GAHT group compared to the GAS group (27.6 vs 28.2, p=0.049). Adults who  
 198 received GAHT without GAS were more likely to have commercial insurance (77.8% vs 71.0%)  
 199 and Medicaid (12.3% vs 7.5%), and less likely to have Medicare (2.9% vs 5.2%) and unknown  
 200 insurance (4.1% vs 14.3%) compared to the GAS group. Adults in the GAHT without GAS  
 201 group were more likely to live in-state (95.3% vs 75.3%, p<0.001) and less likely to be from a  
 202 rural area (6.1% vs 8.9%, p=0.005) compared to the GAS group.

203 Table 5. Demographics of active gender-affirming hormone therapy (GAHT) and gender-  
 204 affirming surgery (GAS)

|                                                       | <b>GAHT without<br/>GAS<sup>a</sup><br/>(N=1779)</b> | <b>GAS<br/>(N=1216)</b> | <b>All<br/>(N=2995)</b> | <b>p-value</b>     |
|-------------------------------------------------------|------------------------------------------------------|-------------------------|-------------------------|--------------------|
| <b>Age at first index date</b>                        |                                                      |                         |                         | <b>&lt;0.001</b>   |
| <=20                                                  | 454 (25.5%)                                          | 174 (14.3%)             | 628 (21.0%)             |                    |
| 21-30                                                 | 923 (51.9%)                                          | 646 (53.1%)             | 1569 (52.4%)            |                    |
| 31-40                                                 | 246 (13.8%)                                          | 237 (19.5%)             | 483 (16.1%)             |                    |
| 41-64                                                 | 144 (8.1%)                                           | 137 (11.3%)             | 281 (9.4%)              |                    |
| 65+                                                   | 12 (0.7%)                                            | 22 (1.8%)               | 34 (1.1%)               |                    |
| <b>Age at first index date - Mean (SD)</b>            | 26.8 (9.26)                                          | 29.8 (10.9)             | 28.0 (10.1)             | <b>&lt;0.001</b>   |
| <b>Therapy start year</b>                             |                                                      |                         |                         | <b>&lt;0.001</b>   |
| 2003-2016                                             | 141 (7.9%)                                           | 175 (14.4%)             | 316 (10.6%)             |                    |
| 2017-2018                                             | 179 (10.1%)                                          | 203 (16.7%)             | 382 (12.8%)             |                    |
| 2019                                                  | 206 (11.6%)                                          | 137 (11.3%)             | 343 (11.5%)             |                    |
| 2020                                                  | 270 (15.2%)                                          | 150 (12.3%)             | 420 (14.0%)             |                    |
| 2021                                                  | 419 (23.6%)                                          | 210 (17.3%)             | 629 (21.0%)             |                    |
| 2022-2023                                             | 564 (31.7%)                                          | 341 (28.0%)             | 905 (30.2%)             |                    |
| <b>Therapy start year – Mean (SD)</b>                 | 2020 (2.49)                                          | 2020 (2.48)             | 2020 (2.50)             | 1.00               |
| <b>Race</b>                                           |                                                      |                         |                         | 0.372 <sup>b</sup> |
| White or Caucasian                                    | 1516 (87.0%)                                         | 1029 (87.2%)            | 2545 (85.0%)            |                    |
| Black or African American                             | 25 (1.4%)                                            | 21 (1.8%)               | 46 (1.5%)               |                    |
| Asian                                                 | 36 (2.1%)                                            | 28 (2.4%)               | 64 (2.1%)               |                    |
| American Indian/Alaska Native                         | 22 (1.3%)                                            | 20 (1.7%)               | 42 (1.4%)               |                    |
| Native Hawaiian/Pacific Islander                      | 15 (0.9%)                                            | 4 (0.3%)                | 19 (0.6%)               |                    |
| Other                                                 | 129 (7.4%)                                           | 78 (6.6%)               | 207 (6.9%)              |                    |
| Unknown race                                          | 36 (-)                                               | 36 (-)                  | 72 (2.4%)               |                    |
| <b>Ethnicity</b>                                      |                                                      |                         |                         | 0.594              |
| Hispanic/Latino                                       | 174 (10.2%)                                          | 127 (10.9%)             | 301 (10.1%)             |                    |
| Not Hispanic/Latino                                   | 1529 (89.8%)                                         | 1037 (89.1%)            | 2566 (85.7%)            |                    |
| Unknown ethnicity                                     | 76 (-)                                               | 52 (-)                  | 128 (4.3%)              |                    |
| <b>Body Mass Index (BMI)<br/>category<sup>c</sup></b> |                                                      |                         |                         | <b>&lt;0.001</b>   |

|                                                |              |              |              |                  |
|------------------------------------------------|--------------|--------------|--------------|------------------|
| Underweight (<18.5)                            | 77 (5.5%)    | 26 (2.2%)    | 103 (3.4%)   |                  |
| Normal (18.5 - 24.99)                          | 561 (39.7%)  | 418 (35.0%)  | 979 (32.7%)  |                  |
| Overweight (25.0 - 29.99)                      | 344 (24.4%)  | 349 (29.2%)  | 693 (23.1%)  |                  |
| Obese ( $\geq$ 30)                             | 430 (30.5%)  | 402 (33.6%)  | 832 (27.8%)  |                  |
| Unknown BMI                                    | 367 (-)      | 21 (-)       | 388 (13.0%)  |                  |
| <b>Body Mass Index - Mean (SD)<sup>c</sup></b> | 27.6 (7.90)  | 28.2 (6.71)  | 27.9 (7.38)  | <b>0.049</b>     |
| <b>Body Mass Index - Mean (SD)<sup>d</sup></b> | 27.4 (7.69)  | 28.1 (6.66)  | 27.7 (7.24)  | <b>0.018</b>     |
| <b>Marital status</b>                          |              |              |              | <b>&lt;0.001</b> |
| Married/Life partner                           | 305 (18.6%)  | 307 (26.9%)  | 612 (20.4%)  |                  |
| Divorced/Legally separated                     | 76 (4.6%)    | 57 (5.0%)    | 133 (4.4%)   |                  |
| Widowed                                        | 6 (0.4%)     | 7 (0.6%)     | 13 (0.4%)    |                  |
| Single                                         | 1252 (76.4%) | 770 (67.5%)  | 2022 (67.5%) |                  |
| Unknown/Other                                  | 140 (-)      | 75 (-)       | 215 (7.2%)   |                  |
| <b>Sex (EHR<sup>e</sup> reported)</b>          |              |              |              | <b>&lt;0.001</b> |
| Female                                         | 782 (44.1%)  | 794 (65.6%)  | 1576 (52.6%) |                  |
| Male                                           | 980 (55.3%)  | 404 (33.4%)  | 1384 (46.2%) |                  |
| Nonbinary                                      | 10 (0.6%)    | 13 (1.1%)    | 23 (0.8%)    |                  |
| Unknown sex                                    | 7 (-)        | 5 (-)        | 12 (0.4%)    |                  |
| <b>Gender identity</b>                         |              |              |              | <b>&lt;0.001</b> |
| Female                                         | 275 (15.5%)  | 104 (8.6%)   | 379 (12.7%)  |                  |
| Male                                           | 146 (8.2%)   | 120 (9.9%)   | 266 (8.9%)   |                  |
| Transgender Female                             | 578 (32.5%)  | 177 (14.6%)  | 755 (25.2%)  |                  |
| Transgender Male                               | 340 (19.1%)  | 345 (28.4%)  | 685 (22.9%)  |                  |
| Non-binary                                     | 194 (10.9%)  | 142 (11.7%)  | 336 (11.2%)  |                  |
| Unknown gender identity                        | 246 (13.8%)  | 328 (27.0%)  | 574 (19.2%)  |                  |
| <b>Insurance status</b>                        |              |              |              | <b>&lt;0.001</b> |
| Commercial                                     | 1384 (77.8%) | 863 (71.0%)  | 2247 (75.0%) |                  |
| Medicaid                                       | 218 (12.3%)  | 91 (7.5%)    | 309 (10.3%)  |                  |
| Medicare                                       | 53 (3.0%)    | 63 (5.2%)    | 116 (3.9%)   |                  |
| Misc Government                                | 51 (2.9%)    | 25 (2.1%)    | 76 (2.5%)    |                  |
| Unknown insurance                              | 73 (4.1%)    | 174 (14.3%)  | 247 (8.2%)   |                  |
| <b>State</b>                                   |              |              |              | <b>&lt;0.001</b> |
| Idaho                                          | 17 (1.0%)    | 96 (7.9%)    | 113 (3.8%)   |                  |
| Nevada                                         | 11 (0.6%)    | 47 (3.9%)    | 58 (1.9%)    |                  |
| Utah                                           | 1695 (95.3%) | 915 (75.3%)  | 2610 (87.1%) |                  |
| Wyoming                                        | 25 (1.4%)    | 17 (1.4%)    | 42 (1.4%)    |                  |
| Other states <sup>f</sup>                      | 31 (1.7%)    | 140 (11.5%)  | 171 (5.7%)   |                  |
| Unknown state                                  | 0 (0%)       | 1 (-)        | 1 (0.0%)     |                  |
| <b>Rurality</b>                                |              |              |              | <b>0.005</b>     |
| Urban                                          | 1670 (93.9%) | 1107 (91.1%) | 2777 (92.7%) |                  |
| Rural                                          | 109 (6.1%)   | 108 (8.9%)   | 217 (7.2%)   |                  |
| Unknown                                        | 0 (0%)       | 1 (-)        | 1 (0.0%)     |                  |

205  
 206 <sup>a</sup>Missing values were not included when calculating the p-values (chi-square test is used to compare categories, t-test  
 207 is used to compare means)  
 208 <sup>b</sup>Fisher's exact test used  
 209 <sup>c</sup>Mean BMI before and closest to index date  
 210 <sup>d</sup>Mean BMI of all BMI's prior to index date  
 211 <sup>e</sup>EHR = Electronic Health Record  
 212 <sup>f</sup>Other state include: AZ, CA, CO, CT, HI, IL, KY, MD, MO, MS, MT, NM, NY, OH, OK, OR, PA, SC, SD, TN,  
 213 TX, WA

214 Table 6 reports the descriptive characteristics for TGD adults actively managed (receiving 2 or  
 215 more prescriptions) with either estrogen-based (n=1,325) or testosterone-based (n=1,075)  
 216 GAHT. Compared to TGD adults on estrogen-based therapy, individuals on testosterone-based  
 217 therapy were overall younger (mean age 29.3 vs 25.4 years old, p<0.001), more diverse  
 218 (Hispanic/Latino: 7.2% vs 13.7%), and more likely to have a higher starting BMI (mean BMI at  
 219 start of GAHT 26.8 vs 29.1, p<0.001). Adults on testosterone were more likely to have  
 220 undergone gender-affirming surgery (35.8% vs 17.8%, p<0.001), specifically top surgery (29.2  
 221 vs 3.4%) compared to TGD adults on estrogen. For insurance status, those on estrogen-based  
 222 GAHT were more likely to have Medicaid (12.5% vs 10.5%) and Medicare (4.7% vs 2.4%), and  
 223 less likely to have commercial insurance (76.2% vs 81.3%) compared to those on testosterone-  
 224 based GAHT.

225 Table 6. Demographics based on type of gender-affirming hormone therapy: Estrogen versus  
 226 testosterone<sup>a</sup>

|                                                         | Estrogen<br>(N=1325) | Testosterone<br>(N=1075) | All<br>(N=2400) | p-value <sup>b</sup>         |
|---------------------------------------------------------|----------------------|--------------------------|-----------------|------------------------------|
| <b>Age at first hormone prescriptio</b>                 |                      |                          |                 | <b>&lt;0.001<sup>c</sup></b> |
| 18-20                                                   | 235 (17.7%)          | 311 (28.9%)              | 546 (22.8%)     |                              |
| 21-30                                                   | 670 (50.6%)          | 576 (53.6%)              | 1246 (51.9%)    |                              |
| 31-40                                                   | 230 (17.4%)          | 139 (12.9%)              | 369 (15.4%)     |                              |
| 41-64                                                   | 169 (12.8%)          | 46 (4.3%)                | 215 (9.0%)      |                              |
| 65+                                                     | 21 (1.6%)            | 3 (0.3%)                 | 24 (1.0%)       |                              |
| <b>Age at first hormone<br/>prescription- Mean (SD)</b> | 29.3 (11.1)          | 25.4 (7.54)              | 27.6 (9.84)     | <b>&lt;0.001</b>             |
| <b>Therapy start year</b>                               |                      |                          |                 | <b>0.029</b>                 |
| 2005-2016                                               | 115 (8.7%)           | 136 (12.7%)              | 251 (10.5%)     |                              |
| 2017-2018                                               | 176 (13.3%)          | 134 (12.5%)              | 310 (12.9%)     |                              |
| 2019                                                    | 171 (12.9%)          | 132 (12.3%)              | 303 (12.6%)     |                              |

|                                                |              |             |              |                              |
|------------------------------------------------|--------------|-------------|--------------|------------------------------|
| 2020                                           | 210 (15.8%)  | 167 (15.5%) | 377 (15.7%)  |                              |
| 2021                                           | 314 (23.7%)  | 220 (20.5%) | 534 (22.3%)  |                              |
| 2022-2023                                      | 339 (25.6%)  | 286 (26.6%) | 625 (26.0%)  |                              |
| <b>Therapy start year – Mean (SD)</b>          | 2020 (2.58)  | 2020 (2.57) | 2020 (2.58)  | 0.188                        |
| <b>Race</b>                                    |              |             |              | <b>0.004</b>                 |
| White or Caucasian                             | 1153 (89.3%) | 907 (85.6%) | 2060 (85.8%) |                              |
| Black or African American                      | 11 (0.9%)    | 25 (2.4%)   | 36 (1.5%)    |                              |
| Asian                                          | 25 (1.9%)    | 22 (2.1%)   | 47 (2.0%)    |                              |
| American Indian/ Alaska Native                 | 19 (1.5%)    | 11 (1.0%)   | 30 (1.3%)    |                              |
| Native Hawaiian/Pacific Islander               | 12 (0.9%)    | 7 (0.7%)    | 19 (0.8%)    |                              |
| Other                                          | 71 (5.5%)    | 87 (8.2%)   | 158 (6.6%)   |                              |
| Unknown race                                   | 34 (-)       | 16 (-)      | 50 (2.1%)    |                              |
| <b>Ethnicity</b>                               |              |             |              | <b>&lt;0.001</b>             |
| Hispanic/Latino                                | 91 (7.2%)    | 142 (13.7%) | 233 (9.7%)   |                              |
| Not Hispanic/Latino                            | 1172 (92.8%) | 896 (86.3%) | 2068 (86.2%) |                              |
| Unknown ethnicity                              | 62 (-)       | 37 (-)      | 99 (4.1%)    |                              |
| <b>Body Mass Index category<sup>d</sup></b>    |              |             |              | <b>&lt;0.001</b>             |
| Underweight (<18.5)                            | 53 (5.1%)    | 40 (4.5%)   | 93 (3.9%)    |                              |
| Normal (18.5 - 24.99)                          | 439 (42.6%)  | 294 (33.2%) | 733 (30.5%)  |                              |
| Overweight (25.0 - 29.99)                      | 274 (26.6%)  | 220 (24.9%) | 494 (20.6%)  |                              |
| Obese (>=30)                                   | 265 (25.7%)  | 331 (37.4%) | 596 (24.8%)  |                              |
| Unknown BMI                                    | 294 (-)      | 190 (-)     | 484 (-)      |                              |
| <b>Body Mass Index - Mean (SD)<sup>d</sup></b> | 26.8 (7.00)  | 29.1 (8.32) | 27.8 (7.72)  | <b>&lt;0.001</b>             |
| <b>Body Mass Index - Mean (SD)<sup>e</sup></b> | 26.6 (6.90)  | 28.7 (8.09) | 27.6 (7.54)  | <b>&lt;0.001</b>             |
| Married/Life partner                           | 250 (20.4%)  | 232 (23.1%) | 482 (20.1%)  |                              |
| Divorced/Legally separated                     | 85 (6.9%)    | 34 (3.4%)   | 119 (5.0%)   |                              |
| Widowed                                        | 11 (0.9%)    | 1 (0.1%)    | 12 (0.5%)    |                              |
| Single                                         | 878 (71.7%)  | 737 (73.4%) | 1615 (67.3%) |                              |
| Unknown/Other                                  | 101 (-)      | 71 (-)      | 172 (7.2%)   |                              |
| <b>Sex (EHR<sup>f</sup> reported)</b>          |              |             |              | <b>&lt;0.001<sup>g</sup></b> |
| Female                                         | 392 (29.7%)  | 770 (71.6%) | 1162 (48.4%) |                              |
| Male                                           | 921 (69.9%)  | 295 (27.4%) | 1216 (50.7%) |                              |
| Nonbinary                                      | 5 (0.4%)     | 10 (0.9%)   | 15 (0.6%)    |                              |
| Unknown sex                                    | 7 (-)        | 0 (-)       | 7 (0.3%)     |                              |
| <b>Gender identity</b>                         |              |             |              | <b>&lt;0.001<sup>h</sup></b> |
| Female                                         | 336 (25.4%)  | 10 (0.9%)   | 346 (14.4%)  |                              |
| Male                                           | 17 (1.3%)    | 206 (19.2%) | 223 (9.3%)   |                              |
| Transgender Female                             | 721 (54.4%)  | 3 (0.3%)    | 724 (30.2%)  |                              |
| Transgender Male                               | 4 (0.3%)     | 534 (49.7%) | 538 (22.4%)  |                              |
| Non-binary                                     | 93 (7.0%)    | 161 (15.0%) | 254 (10.6%)  |                              |
| Unknown gender identity                        | 154 (11.6%)  | 161 (15.0%) | 315 (13.1%)  |                              |

|                                      |              |              |              |                  |
|--------------------------------------|--------------|--------------|--------------|------------------|
| <b>Insurance status</b>              |              |              |              | <b>0.002</b>     |
| Commercial                           | 1010 (76.2%) | 874 (81.3%)  | 1884 (78.5%) |                  |
| Medicaid                             | 166 (12.5%)  | 113 (10.5%)  | 279 (11.6%)  |                  |
| Medicare                             | 62 (4.7%)    | 26 (2.4%)    | 88 (3.7%)    |                  |
| Misc Government                      | 40 (3.0%)    | 22 (2.0%)    | 62 (2.6%)    |                  |
| Unknown insurance                    | 47 (3.5%)    | 40 (3.7%)    | 87 (3.6%)    |                  |
| <b>State</b>                         |              |              |              | <b>0.386</b>     |
| Idaho                                | 27 (2.0%)    | 15 (1.4%)    | 42 (1.8%)    |                  |
| Nevada                               | 12 (0.9%)    | 11 (1.0%)    | 23 (1.0%)    |                  |
| Utah                                 | 1246 (94.0%) | 1003 (93.3%) | 2249 (93.7%) |                  |
| Wyoming                              | 15 (1.1%)    | 17 (1.6%)    | 32 (1.3%)    |                  |
| Other states <sup>§</sup>            | 25 (1.9%)    | 29 (2.7%)    | 54 (2.3%)    |                  |
| <b>Gender-affirming surgery</b>      |              |              |              | <b>&lt;0.001</b> |
| No                                   | 1089 (82.2%) | 690 (64.2%)  | 1779 (74.1%) |                  |
| Yes                                  | 236 (17.8%)  | 385 (35.8%)  | 621 (25.9%)  |                  |
| <b>Gender-Affirming surgery type</b> |              |              |              | <b>&lt;0.001</b> |
| Top                                  | 45 (3.4%)    | 314 (29.2%)  | 359 (15.0%)  |                  |
| Bottom                               | 134 (10.1%)  | 31 (2.9%)    | 165 (6.9%)   |                  |
| Both                                 | 57 (4.3%)    | 40 (3.7%)    | 97 (4.0%)    |                  |
| No surgery                           | 1089 (82.2%) | 690 (64.2%)  | 1779 (74.1%) |                  |
| <b>Rurality</b>                      |              |              |              | <b>0.097</b>     |
| Urban                                | 1253 (94.6%) | 998 (92.8%)  | 2251 (93.8%) |                  |
| Rural                                | 72 (5.4%)    | 77 (7.2%)    | 149 (6.2%)   |                  |

227 <sup>a</sup>Individuals had at least two unique prescriptions for hormone therapy  
228 <sup>b</sup>Missing values were not included when calculating the p-values (chi-square test is used to compare categories, t-test  
229 is used to compare means)  
230 <sup>c</sup>Fisher's exact test used  
231 <sup>d</sup>Mean BMI before and closest to index date  
232 <sup>e</sup>Mean BMI of all BMI's prior to index date  
233 <sup>f</sup>EHR = Electronic Health Record  
234 <sup>§</sup>Other state include: AZ, CA, CO, CT, HI, IL, KY, MD, MO, MS, MT, NM, NY, OH, OK, OR, PA, SC, SD, TN,  
235 TX, WA  
236

237 Table 7 reports the descriptive characteristics for adults who underwent either feminizing or  
238 masculinizing gender-affirming surgery. The mean age of individuals who underwent feminizing  
239 surgery was significantly older than those who underwent masculinizing surgery (37.6 years old  
240 vs 27.3 years old,  $p < 0.001$ ). More than half (58.8%) of masculinizing surgeries were performed  
241 in adults between 21 and 30 years old. Although there was no significant difference in race



242 between surgery type, masculinizing surgery had a higher percentage of adults who identified as  
 243 Hispanic/Latino (12.3% vs 6.8%) compared to adults who underwent feminizing surgery. Adults  
 244 who underwent masculinizing surgery were more likely to have adults with unknown insurance  
 245 status (18.1% vs 2.4%), more likely to have people from out-of-state (27.0% vs 17.3%), and  
 246 more likely to have undergone top surgery (91.0% vs 24.8%) compared to those who underwent  
 247 feminizing surgery. Figure 2 shows the temporal trends of individuals undergoing gender-  
 248 affirming surgery since 2013. The number of GAS per year has almost doubled from 2019 to  
 249 2022.

250 Table 7. Demographics based on type of gender-affirming surgery: Feminizing versus  
 251 Masculinizing

|                                       | Feminizing<br>(N=294) | Masculinizing<br>(N=922) | All<br>(N=1216) | p-value <sup>a</sup> |
|---------------------------------------|-----------------------|--------------------------|-----------------|----------------------|
| <b>Age at index date<sup>b</sup></b>  |                       |                          |                 | <b>&lt;0.001</b>     |
| <=20                                  | 11 (3.7%)             | 163 (17.7%)              | 174 (14.3%)     |                      |
| 21-30                                 | 104 (35.4%)           | 542 (58.8%)              | 646 (53.1%)     |                      |
| 31-40                                 | 87 (29.6%)            | 150 (16.3%)              | 237 (19.5%)     |                      |
| 41-64                                 | 72 (24.5%)            | 65 (7.0%)                | 137 (11.3%)     |                      |
| 65+                                   | 20 (6.8%)             | 2 (0.2%)                 | 22 (1.8%)       |                      |
| <b>Age at index date - Mean (SD)</b>  | 37.6 (14.1)           | 27.3 (8.16)              | 29.8 (10.9)     | <b>&lt;0.001</b>     |
| <b>Surgery start year</b>             |                       |                          |                 | <b>&lt;0.001</b>     |
| 2013-2016                             | 8 (2.7%)              | 167 (18.1%)              | 175 (14.4%)     |                      |
| 2017-2018                             | 24 (8.2%)             | 179 (19.4%)              | 203 (16.7%)     |                      |
| 2019                                  | 37 (12.6%)            | 100 (10.8%)              | 137 (11.3%)     |                      |
| 2020                                  | 42 (14.3%)            | 108 (11.7%)              | 150 (12.3%)     |                      |
| 2021                                  | 75 (25.5%)            | 135 (14.6%)              | 211 (17.3%)     |                      |
| 2022-2023                             | 108 (36.6%)           | 233 (25.3%)              | 341 (28.0%)     |                      |
| <b>Surgery start year – Mean (SD)</b> | 2020 (1.71)           | 2020 (2.59)              | 2020 (2.48)     | 1.00                 |
| <b>Race</b>                           |                       |                          |                 | 0.087 <sup>c</sup>   |
| White or Caucasian                    | 255 (89.2%)           | 774 (86.5%)              | 1029 (84.6%)    |                      |
| Black or African American             | 1 (0.3%)              | 20 (2.2%)                | 21 (1.7%)       |                      |
| Asian                                 | 8 (2.8%)              | 20 (2.2%)                | 28 (2.3%)       |                      |
| American Indian/Alaska Native         | 7 (2.4%)              | 13 (1.5%)                | 20 (1.6%)       |                      |
| Native Hawaiian/Pacific Islander      | 1 (0.3%)              | 3 (0.3%)                 | 4 (0.3%)        |                      |
| Other                                 | 13 (4.4%)             | 65 (7.3%)                | 78 (6.4%)       |                      |
| Unknown race                          | 9 (-)                 | 27 (-)                   | 36 (3.0%)       |                      |
| <b>Ethnicity</b>                      |                       |                          |                 | <b>0.009</b>         |

|                                                |             |             |              |                              |
|------------------------------------------------|-------------|-------------|--------------|------------------------------|
| Hispanic/Latino                                | 18 (6.8%)   | 109 (12.3%) | 127 (10.4%)  |                              |
| Not Hispanic/Latino                            | 260 (93.2%) | 777 (87.7%) | 1037 (85.3%) |                              |
| Unknown ethnicity                              | 16 (-)      | 36 (-)      | 52 (4.3%)    |                              |
| <b>Body Mass Index category<sup>d</sup></b>    |             |             |              | <b>&lt;0.001</b>             |
| Underweight (<18.5)                            | 12 (4.1%)   | 14 (1.6%)   | 26 (2.1%)    |                              |
| Normal (18.5 - 24.99)                          | 124 (42.3%) | 294 (32.6%) | 418 (34.4%)  |                              |
| Overweight (25.0 - 29.99)                      | 86 (29.4%)  | 263 (29.1%) | 349 (28.7%)  |                              |
| Obese (>=30)                                   | 70 (24.2%)  | 332 (36.8%) | 402 (33.1%)  |                              |
| Unknown BMI                                    | 2 (-)       | 19 (-)      | 21 (1.7%)    |                              |
| <b>Body Mass Index - Mean (SD)<sup>d</sup></b> | 26.6 (6.12) | 28.7 (6.81) | 28.2 (6.71)  | <b>&lt;0.001</b>             |
| <b>Body Mass Index - Mean (SD)<sup>e</sup></b> | 26.6 (6.08) | 28.6 (6.77) | 28.1 (6.66)  | <b>&lt;0.001</b>             |
| <b>Marriage Status</b>                         |             |             |              | <b>&lt;0.001<sup>c</sup></b> |
| Married/Life partner                           | 86 (31.4%)  | 221 (25.5%) | 307 (25.2%)  |                              |
| Divorced/Legally separated                     | 33 (11.9%)  | 24 (2.8%)   | 57 (4.7%)    |                              |
| Widowed                                        | 7 (2.5%)    | 0 (0%)      | 7 (0.6%)     |                              |
| Single                                         | 150 (54.2%) | 620 (71.7%) | 770 (63.3%)  |                              |
| Unknown/Other                                  | 18 (-)      | 57 (-)      | 75 (6.2%)    |                              |
| <b>Sex (EHR<sup>f</sup> reported)</b>          |             |             |              | 0.090 <sup>c</sup>           |
| Female                                         | 191 (65.0%) | 603 (65.7%) | 794 (65.3%)  |                              |
| Male                                           | 102 (35.5%) | 302 (32.9%) | 404 (33.2%)  |                              |
| Nonbinary                                      | 0 (0%)      | 13 (1.4%)   | 13 (1.1%)    |                              |
| Unknown sex                                    | 1 (-)       | 4 (-)       | 5 (0.4%)     |                              |
| <b>Gender identity</b>                         |             |             |              | <b>&lt;0.001<sup>c</sup></b> |
| Female                                         | 86 (29.3%)  | 18 (2.0%)   | 104 (8.6%)   |                              |
| Male                                           | 2 (0.7%)    | 118 (12.8%) | 120 (9.9%)   |                              |
| Transgender Female                             | 174 (59.2%) | 3 (0.3%)    | 177 (14.6%)  |                              |
| Transgender Male                               | 2 (0.7%)    | 343 (37.2%) | 345 (28.4%)  |                              |
| Non-binary                                     | 9 (3.1%)    | 133 (14.4%) | 142 (11.7%)  |                              |
| Unknown gender identity                        | 21 (7.1%)   | 307 (33.3%) | 328 (27.0%)  |                              |
| <b>Insurance status</b>                        |             |             |              | <b>&lt;0.001<sup>c</sup></b> |
| Commercial                                     | 218 (74.1%) | 645 (70.0%) | 863 (71.0%)  |                              |
| Medicaid                                       | 32 (10.9%)  | 59 (6.4%)   | 91 (7.5%)    |                              |
| Medicare                                       | 35 (11.9%)  | 28 (3.0%)   | 63 (5.2%)    |                              |
| Misc Government                                | 2 (0.7%)    | 23 (2.5%)   | 25 (2.1%)    |                              |
| Unknown insurance                              | 7 (2.4%)    | 167 (18.1%) | 174 (14.3%)  |                              |
| <b>State</b>                                   |             |             |              | <b>0.004<sup>s</sup></b>     |
| Idaho                                          | 19 (6.5%)   | 77 (8.4%)   | 96 (7.9%)    |                              |
| Nevada                                         | 12 (4.1%)   | 35 (3.8%)   | 47 (3.9%)    |                              |
| Utah                                           | 243 (82.7%) | 672 (73.0%) | 915 (75.2%)  |                              |
| Wyoming                                        | 2 (0.7%)    | 15 (1.6%)   | 17 (1.4%)    |                              |
| Other states <sup>s</sup>                      | 18 (6.1%)   | 122 (13.2%) | 140 (11.5%)  |                              |
| Unknown state                                  | 0 (0%)      | 1 (-)       | 1 (0.1%)     |                              |

|                     |             |             |              |                  |
|---------------------|-------------|-------------|--------------|------------------|
| <b>Rurality</b>     |             |             |              | 0.931            |
| Urban               | 267 (90.8%) | 840 (91.2%) | 1107 (91.0%) |                  |
| Rural               | 27 (9.2%)   | 81 (8.8%)   | 108 (8.9%)   |                  |
| Unknown             | 0 (0%)      | 1 (-)       | 1 (0.1%)     |                  |
| <b>Surgery type</b> |             |             |              | <b>&lt;0.001</b> |
| Top                 | 73 (24.8%)  | 839 (91.0%) | 912 (75.0%)  |                  |
| Bottom              | 157 (53.4%) | 41 (4.4%)   | 198 (16.3%)  |                  |
| Both                | 64 (21.8%)  | 42 (4.6%)   | 106 (8.7%)   |                  |

252 <sup>a</sup>Missing values were not included when calculating the p-values (chi-square test is used to compare categories, t-  
253 test is used to compare means)

254 <sup>b</sup>Index date = year of first surgery

255 <sup>c</sup>Fisher's exact test used

256 <sup>d</sup>Mean BMI before and closest to index date

257 <sup>e</sup>Mean BMI of all BMI's prior to index date

258 <sup>f</sup>EHR = Electronic Health Record

259 <sup>g</sup>Other state include: AZ, CA, CO, CT, HI, IL, KY, MD, MO, MS, MT, NM, NY, OH, OK, OR, PA, SC, SD, TN,  
260 TX, WA

261

262

263 Figure 2: Gender-affirming surgery trends at a Utah-based healthcare system (2013-2022)

264

## 265 Discussion

266 This paper outlines the steps utilized to describe adults who identify as TGD via electronic health

267 record data with the goal to use this information as an a clinical and equity tool to answer

268 important clinical questions that have largely remained unanswered because previous analyses of

269 other cohorts were insufficiently powered. Almost fifteen percent (14.9%) of adults seeking

270 gender-affirming care lived out of state, and 8.4% lived in rural areas. Almost two-thirds (65.3%)

271 of the total volume of individuals who received GAHT and/or GAS at this healthcare institution

272 had an index date between 2020 – May 2023. The exponential growth in patient volume is

273 reflective of the growing needs of the community as well as the growing number of providers

274 who can provide gender-affirming care within the institution particularly across state lines.

275 Almost three-quarters (73.4%) of TGD adults had an index date for gender-affirming care

276 (GAHT or GAS) prior to the age of 30. Based on national surveys, researchers estimate the

277 percentage of teenagers and young adults who identify as TGD has doubled in the past five  
278 years, with 1.3% of 18- to 24-year old identifying as TGD [3]. In contrast, 0.5% of individuals  
279 25 to 64 identify as TGD, and 0.3% of individuals 65 and older are TGD [3,20]. Thus, the  
280 number of individuals seeking out GAHT is expected to continue to grow. Furthermore, the  
281 number of GAS within this healthcare institution has nearly tripled from 2016 to 2019 [34].  
282 Similar to the Wright et al's cohort study, when stratified by age, patients 19-30 years-old had  
283 the greatest number of procedures; top surgeries were the most common [34].

284 Insurance coverage for gender-affirming care, particularly GAS, is variable within the US [35].  
285 In this cohort, 14.3% of all TGD adults who underwent GAS had unknown insurance status, and  
286 this increased to 18.1% for those who had masculinizing GAS. These individuals are assumed to  
287 be either uninsured or paid out of pocket for GAS services. Compared to the general US  
288 population, TGD adults are more likely to be uninsured, unemployed, and living in poverty [36–  
289 38]. Even for those with insurance, they commonly face insurance denials for gender-affirming  
290 treatments as they are often considered elective cosmetic procedures [35]. Although restrictions  
291 for gender-affirming services have been receding, the co-pay can still be cost prohibitive [37].  
292 Further research is needed to explore the differences amongst those with unknown insurance  
293 status – who has the finances to pursue gender-affirming care compared to those who cannot  
294 access care due to insurance barriers.

295 Nationally, roughly one in six (16%) TGD individuals live in rural areas [3,39]. This Utah-based  
296 cohort data categorized 8.4% of TGD adults living in rural areas, and this percentage increased  
297 to 10.5% for adults who met the criteria for TGD but had not sought active GAHT or GAS. The  
298 discrepancy in the percentage of adults living in rural areas and percentage of those seeking  
299 gender-affirming care is attributed to significant health disparities, one of which includes access

300 to healthcare [40–42]. The rapid adoption of telehealth during the COVID-19 pandemic  
301 bolstered the total number of TGD visits, for both new and established TGD adults [43]. Increase  
302 in access amongst those in rural communities is not as clear. Transgender and gender-diverse  
303 adults living in rural areas are twice as likely as their cisgender peers to be uninsured, and rural  
304 TGD people of color are three times as likely as their White, cisgender neighbors to be uninsured  
305 [41]. Further research is needed to examine how telehealth has affected access to gender-  
306 affirming care in rural communities, and how insurance status affects access.

307 Research studies focused on answering clinical questions related to gender-affirming hormone  
308 therapy have been exponentially growing. Although a national longitudinal cohort study is  
309 actively trending the physical, mental and social health data of TGD adults, the results of their  
310 study will not be available for years [44]. This delay in evaluating gender-affirming services  
311 presents a major barrier for the providers and patients facilitating and receiving care now.

312 Currently, healthcare providers rely on guidelines published by WPATH [1], University of  
313 California San Francisco [45], Fenway [46], or the Endocrine Society [47]. These consensus-  
314 based guidelines have relied on findings from smaller cohort studies, but the number of larger  
315 scale studies is growing. Additionally, studies comparing health outcomes between those who  
316 underwent gender-affirming care (surgical or medical therapy) versus not is also growing  
317 [34,48,49]. The goal of creating this population cohort is to start answering clinically pertinent  
318 questions about patient outcomes as well as identifying health inequities.

319 A strength and unique aspect of this study is each person was assigned an index date based on  
320 their initial gender-affirming hormone therapy prescription or date of first gender-affirming  
321 surgery. This will allow future studies to track trends over time including laboratory values,  
322 medication dosages, and the incidence and prevalence of certain health conditions. Although, the

323 demographics of this mountain west healthcare system is not a nationally representative sample,  
324 it is reflective of the state's demographics. Many studies looking at the population of TGD adults  
325 have been concentrated along both coasts, and this represents the first cohort of its kind in a  
326 mountain west, conservative state.

### 327 **Limitations**

328 Reliance on ICD-9 and ICD-10 codes for gender dysphoria places undue emphasis on medical  
329 diagnoses billed by healthcare providers. The number of TGD adults estimated here is likely an  
330 underestimate. Some individuals who experience gender dysphoria or gender incongruence may  
331 choose not to disclose their concerns to healthcare professionals due to mistrust of the healthcare  
332 system [50–52]. Before insurance coverage changes, certain TGD adults explicitly requested that  
333 billing codes related to gender dysphoria not be used, as their insurance companies refused to  
334 cover these medical services. A few TGD adults who still had parental health insurance also  
335 requested different codes because they hadn't disclosed their gender identity yet. Consequently,  
336 providers used alternative codes such as endocrine disorder, unspecified. Furthermore, there are  
337 individuals who do not identify as TGD but may have been captured in this cohort due to coding  
338 error (such as, but limited to, those captured on manual chart review). The index date assigned is  
339 based on the date of the individual's first prescription for estrogen or testosterone within this  
340 mountain west healthcare system. This data cannot differentiate if this is the individual's first  
341 prescription to start gender-affirming hormone therapy or if the individual had already been on  
342 GAHT and was transferring their care to this healthcare system.

### 343 **Conclusions**

344 In conclusion, the findings from this dataset underscore a significant alignment with national  
345 trends indicating a rapid increase in the number of TGD adults actively pursuing gender-  
346 affirming care. What distinguishes this dataset is the creation of an index date to trend changes  
347 both from gender-affirming hormone therapy as well as gender-affirming surgeries. The goal is  
348 to utilize this as a clinical and health equity tool further advance the quality of health care  
349 provided to the TGD community. There is a critical need for targeted interventions and policy  
350 initiatives to bridge the healthcare divide, ensuring equitable access to life-affirming treatments  
351 for all, regardless of people’s geographic location.

352

353 **Acknowledgements:** University of Utah Department of Family and Preventive Medicine Health  
354 Studies Fund Clinician Scholars Program with support from Research Manager Eliza Taylor,  
355 MPH

356

357 **References**

358

359 1. Coleman E, Radix AE, Bouman WP, Brown GR, de Vries ALC, Deutsch MB, et al.  
360 Standards of Care for the Health of Transgender and Gender Diverse People, Version 8. *Int J*  
361 *Transgender Health*. 23(Suppl 1):S1–259.

362 2. Baker KE. Findings From the Behavioral Risk Factor Surveillance System on Health-Related  
363 Quality of Life Among US Transgender Adults, 2014-2017. *JAMA Intern Med*. 2019  
364 Aug;179(8):1141–4.

365 3. Herman, J.L., Flores, A.R., O’Neill, K.K L]. How Many Adults and Youth Identify as  
366 Transgender in the United States? [Internet]. The Williams Institute, UCLA School of Law;  
367 [cited 2023 Nov 13]. Available from:  
368 <https://williamsinstitute.law.ucla.edu/publications/trans-adults-united-states/>

369 4. Meerwijk EL, Sevelius JM. Transgender Population Size in the United States: a Meta-  
370 Regression of Population-Based Probability Samples. *Am J Public Health*. 2017  
371 Feb;107(2):e1–8.

372 5. Patterson CJ, Sepúlveda MJ, White J, editors. Understanding the Well-Being of LGBTQI+  
373 Populations [Internet]. Washington, D.C.: National Academies Press; 2020 [cited 2023 Apr  
374 26]. Available from: <https://www.nap.edu/catalog/25877>

375 6. Radix AE, Lelutiu-Weinberger C, Gamarel KE. Satisfaction and Healthcare Utilization of  
376 Transgender and Gender Non-Conforming Individuals in NYC: A Community-Based  
377 Participatory Study. *LGBT Health*. 2014 Dec;1(4):302–8.

378 7. Roberts TK, Fantz CR. Barriers to quality health care for the transgender population. *Clin*  
379 *Biochem*. 2014 Jul;47(10–11):983–7.

380 8. Turban JL, Beckwith N, Reisner SL, Keuroghlian AS. Association Between Recalled  
381 Exposure to Gender Identity Conversion Efforts and Psychological Distress and Suicide  
382 Attempts Among Transgender Adults. *JAMA Psychiatry*. 2020 Jan 1;77(1):68–76.

383 9. Reisner SL, White Hughto JM, Gamarel KE, Keuroghlian AS, Mizock L, Pachankis J.  
384 Discriminatory experiences associated with posttraumatic stress disorder symptoms among  
385 transgender adults. *J Couns Psychol*. 2016 Oct;63(5):509–19.

386 10. Seelman KL, Colón-Díaz MJP, LeCroix RH, Xavier-Brier M, Kattari L. Transgender  
387 Noninclusive Healthcare and Delaying Care Because of Fear: Connections to General Health  
388 and Mental Health Among Transgender Adults. *Transgender Health*. 2017 Dec;2(1):17–28.

389 11. Hughto JMW, Quinn EK, Dunbar MS, Rose AJ, Shireman TI, Jasuja GK. Prevalence and  
390 Co-occurrence of Alcohol, Nicotine, and Other Substance Use Disorder Diagnoses Among  
391 US Transgender and Cisgender Adults. *JAMA Netw Open*. 2021 Feb 4;4(2):e2036512.



- 392 12. Rowe C, Santos GM, McFarland W, Wilson EC. Prevalence and correlates of substance use  
393 among trans\*female youth ages 16–24 years in the San Francisco Bay Area. *Drug Alcohol*  
394 *Depend.* 2015 Feb 1;147:160–6.
- 395 13. Becasen JS, Denard CL, Mullins MM, Higa DH, Sipe TA. Estimating the Prevalence of HIV  
396 and Sexual Behaviors Among the US Transgender Population: A Systematic Review and  
397 Meta-Analysis, 2006–2017. *Am J Public Health.* 2019 Jan;109(1):e1–8.
- 398 14. Baral SD, Poteat T, Strömdahl S, Wirtz AL, Guadamuz TE, Beyrer C. Worldwide burden of  
399 HIV in transgender women: a systematic review and meta-analysis. *Lancet Infect Dis.* 2013  
400 Mar 1;13(3):214–22.
- 401 15. Reisner SL, Murchison GR. A global research synthesis of HIV and STI biobehavioral risks  
402 in female-to-male (FTM) transgender adults. *Glob Public Health.* 2016;11(7–8):866–87.
- 403 16. White Hughto JM, Reisner SL, Pachankis JE. Transgender stigma and health: A critical  
404 review of stigma determinants, mechanisms, and interventions. *Soc Sci Med.* 2015 Dec  
405 1;147:222–31.
- 406 17. Hendricks ML, Testa RJ. A conceptual framework for clinical work with transgender and  
407 gender nonconforming clients: An adaptation of the Minority Stress Model. *Prof Psychol*  
408 *Res Pract.* 2012;43(5):460–7.
- 409 18. Valentine SE, Shipherd JC. A systematic review of social stress and mental health among  
410 transgender and gender non-conforming people in the United States. *Clin Psychol Rev.* 2018  
411 Dec;66:24–38.
- 412 19. Sanchez NF, Sanchez JP, Danoff A. Health Care Utilization, Barriers to Care, and Hormone  
413 Usage Among Male-to-Female Transgender Persons in New York City. *Am J Public Health.*  
414 2009 Apr;99(4):713–9.
- 415 20. Herman JL, Flores AR, Brown TN, Wilson BD, Conron KJ. Age of individuals who identify  
416 as transgender in the United States. eScholarship, University of California; 2017.
- 417 21. Christian R, Mellies AA, Bui AG, Lee R, Kattari L, Gray C. Measuring the Health of an  
418 Invisible Population: Lessons from the Colorado Transgender Health Survey. *J Gen Intern*  
419 *Med.* 2018 Oct;33(10):1654–60.
- 420 22. Streed CG, McCarthy EP, Haas JS. Self-Reported Physical and Mental Health of Gender  
421 Nonconforming Transgender Adults in the United States. *LGBT Health.* 2018 Oct  
422 1;5(7):443–8.
- 423 23. Feldman JL, Luhur WE, Herman JL, Poteat T, Meyer IH. Health and Health Care Access in  
424 the U.S. Transgender Population Health (TransPop) Survey. *Andrology.* 2021  
425 Nov;9(6):1707–18.

- 426 24. Lett E, Asabor EN, Beltrán S, Dowshen N. Characterizing Health Inequities for the U.S.  
427 Transgender Hispanic Population Using the Behavioral Risk Factor Surveillance System.  
428 *Transgender Health*. 2021 Oct 4;6(5):275–83.
- 429 25. Jasuja GK, de Groot A, Quinn EK, Ameli O, Hughto JMW, Dunbar M, et al. Beyond Gender  
430 Identity Disorder Diagnosis Codes: An Examination of Additional Methods to Identify  
431 Transgender Individuals in Administrative Databases. *Med Care*. 2020 Oct;58(10):903–11.
- 432 26. Wolfe HL, Reisman JI, Yoon SS, Blosnich JR, Shipherd JC, Vimalananda VG, et al.  
433 Validating Data-Driven Methods for Identifying Transgender Individuals in the Veterans  
434 Health Administration of the US Department of Veterans Affairs. *Am J Epidemiol*. 2021 Sep  
435 1;190(9):1928–34.
- 436 27. Dubin S, Cook T, Liss A, Doty G, Moore K, Greene R, et al. Comparing Electronic Health  
437 Record Domains' Utility to Identify Transgender Patients. *Transgender Health*. 2022 Feb  
438 14;7(1):78–84.
- 439 28. Roblin D, Barzilay J, Tolsma D, Robinson B, Schild L, Cromwell L, et al. A novel method  
440 for estimating transgender status using electronic medical records. *Ann Epidemiol*. 2016  
441 Mar;26(3):198–203.
- 442 29. Brown GR, Jones KT. Racial Health Disparities in a Cohort of 5,135 Transgender Veterans.  
443 *J Racial Ethn Health Disparities*. 2014 Dec 1;1(4):257–66.
- 444 30. Quinn VP, Nash R, Hunkeler E, Contreras R, Cromwell L, Becerra-Culqui TA, et al. Cohort  
445 profile: Study of Transition, Outcomes and Gender (STRONG) to assess health status of  
446 transgender people. *BMJ Open*. 2017 Dec 27;7(12):e018121.
- 447 31. Wright MA, Doll KM, Myers E, Carpenter WR, Gartner DR, Robinson WR. Changing  
448 trends in Black-White racial differences in surgical menopause: a population-based study.  
449 *Am J Obstet Gynecol*. 2021 Nov 1;225(5):502.e1-502.e13.
- 450 32. Sun M, Choueiri TK, Hamnvik OPR, Preston MA, De Velasco G, Jiang W, et al.  
451 Comparison of Gonadotropin-Releasing Hormone Agonists and Orchiectomy: Effects of  
452 Androgen-Deprivation Therapy. *JAMA Oncol*. 2016 Apr 1;2(4):500–7.
- 453 33. Hall SA, Kaufman JS, Ricketts TC. Defining Urban and Rural Areas in U.S. Epidemiologic  
454 Studies. *J Urban Health*. 2006 Mar;83(2):162–75.
- 455 34. Wright JD, Chen L, Suzuki Y, Matsuo K, Hershman DL. National Estimates of Gender-  
456 Affirming Surgery in the US. *JAMA Netw Open*. 2023 Aug 23;6(8):e2330348.
- 457 35. Padula WV, Baker K. Coverage for Gender-Affirming Care: Making Health Insurance Work  
458 for Transgender Americans. *LGBT Health*. 2017 Aug;4(4):244–7.
- 459 36. GONZALES G, HENNING- SMITH C. Barriers to Care Among Transgender and Gender  
460 Nonconforming Adults. *Milbank Q*. 2017 Dec;95(4):726–48.

- 461 37. Baker K, Restar A. Utilization and Costs of Gender-Affirming Care in a Commercially  
462 Insured Transgender Population. *J Law Med Ethics*. 50(3):456–70.
- 463 38. Patel H, Camacho JM, Salehi N, Garakani R, Friedman L, Reid CM. Journeying Through the  
464 Hurdles of Gender-Affirming Care Insurance: A Literature Analysis. *Cureus*. 15(3):e36849.
- 465 39. Crissman HP, Berger MB, Graham LF, Dalton VK. Transgender Demographics: A  
466 Household Probability Sample of US Adults, 2014. *Am J Public Health*. 2017  
467 Feb;107(2):213–5.
- 468 40. Jackson KJ, Tomlinson S. A review of top performing rural community and critical access  
469 hospitals’ web resources for transgender patients in the United States. *Sex Reprod Healthc*  
470 *Off J Swed Assoc Midwives*. 2021 Sep;29:100627.
- 471 41. Movement Advancement Project. Where We Call Home: Transgender People in Rural  
472 America [Internet]. 2019 [cited 2023 Sep 19]. Available from:  
473 <https://www.lgbtmap.org/file/Rural-Trans-Report-Nov2019.pdf>
- 474 42. Renner J, Blaszyk W, Täuber L, Dekker A, Briken P, Nieder TO. Barriers to Accessing  
475 Health Care in Rural Regions by Transgender, Non-Binary, and Gender Diverse People: A  
476 Case-Based Scoping Review. *Front Endocrinol* [Internet]. 2021 [cited 2023 Apr 4];12.  
477 Available from: <https://www.frontiersin.org/articles/10.3389/fendo.2021.717821>
- 478 43. Lock L, Anderson B, Hill BJ. Transgender Care and the COVID-19 Pandemic: Exploring the  
479 Initiation and Continuation of Transgender Care In-Person and Through Telehealth.  
480 *Transgender Health*. 2022 Apr 11;7(2):165–9.
- 481 44. Lunn MR, Lubensky M, Hunt C, Flentje A, Capriotti MR, Sooksaman C, et al. A digital  
482 health research platform for community engagement, recruitment, and retention of sexual  
483 and gender minority adults in a national longitudinal cohort study—The PRIDE Study. *J*  
484 *Am Med Inform Assoc JAMIA*. 2019 Jun 4;26(8–9):737–48.
- 485 45. Deutsch MB. Guidelines for the Primary and Gender-Affirming Care of Transgender and  
486 Gender Nonbinary People [Internet]. 2nd ed. UCSF Gender Affirming Health Program,  
487 Department of Family and Community Medicine, University of California San Francisco;  
488 2016. Available from: <https://transcare.ucsf.edu/guidelines>
- 489 46. Thompson J, Hopwood R, deNormand S, Cavanaugh T. *Medical Care of Trans and Gender*  
490 *Diverse Adults*. Boston: Fenway Health; 2021 Mar.
- 491 47. Hembree WC, Cohen-Kettenis PT, Gooren L, Hannema SE, Meyer WJ, Murad MH, et al.  
492 *Endocrine Treatment of Gender-Dysphoric/Gender-Incongruent Persons: An Endocrine*  
493 *Society Clinical Practice Guideline*. *J Clin Endocrinol Metab*. 2017 Nov 1;102(11):3869–  
494 903.
- 495 48. Oles N, Darrach H, Landford W, Garza M, Twose C, Park CS, et al. *Gender Affirming*  
496 *Surgery: A Comprehensive, Systematic Review of All Peer-reviewed Literature and*

497 Methods of Assessing Patient-centered Outcomes (Part 1: Breast/Chest, Face, and Voice).  
498 Ann Surg. 2022 Jan 1;275(1):e52–66.

499 49. Oles N, Darrach H, Landford W, Garza M, Twose C, Park CS, et al. Gender Affirming  
500 Surgery: A Comprehensive, Systematic Review of All Peer-reviewed Literature and  
501 Methods of Assessing Patient-centered Outcomes (Part 2: Genital Reconstruction). Ann  
502 Surg. 2022 Jan 1;275(1):e67–74.

503 50. James SE, Herman JL, Rankin S, Keisling M, Mottet L, Anafi M. The report of the 2015 US  
504 transgender survey. Washington, D.C: National Center for Transgender Equality; 2016.

505 51. Kattari SK, Bakko M, Langenderfer-Magruder L, Holloway BT. Transgender and Nonbinary  
506 Experiences of Victimization in Health care. J Interpers Violence. 2021 Dec 1;36(23–  
507 24):NP13054–76.

508 52. Clark KD, Luong S, Lunn MR, Flowers E, Bahalkeh E, Lubensky ME, et al. Healthcare  
509 Mistreatment, State-Level Policy Protections, and Healthcare Avoidance Among Gender  
510 Minority People. Sex Res Soc Policy. 2022 Dec 1;19(4):1717–30.

511  
512 S1 Table. List of estrogen- and testosterone- based medications included

Figure 1. Flow diagram of categorizing transgender and gender diverse adults (2003-2023)

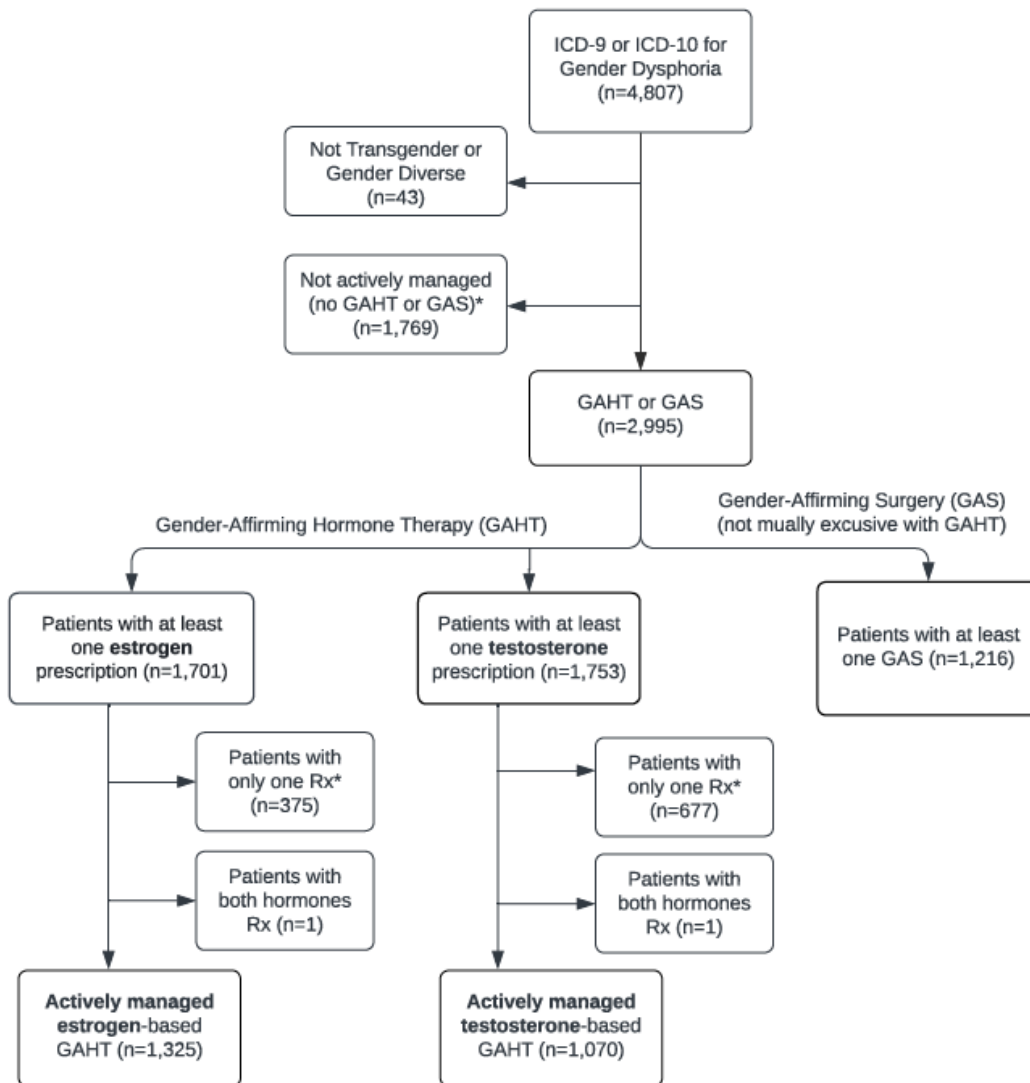

\*Patients with only one prescription (Rx) were excluded from the actively managed GAHT group and counted in the "Not actively managed group"

Figure 2: Gender-affirming surgery trends at a Utah-based healthcare system (2013-2022)

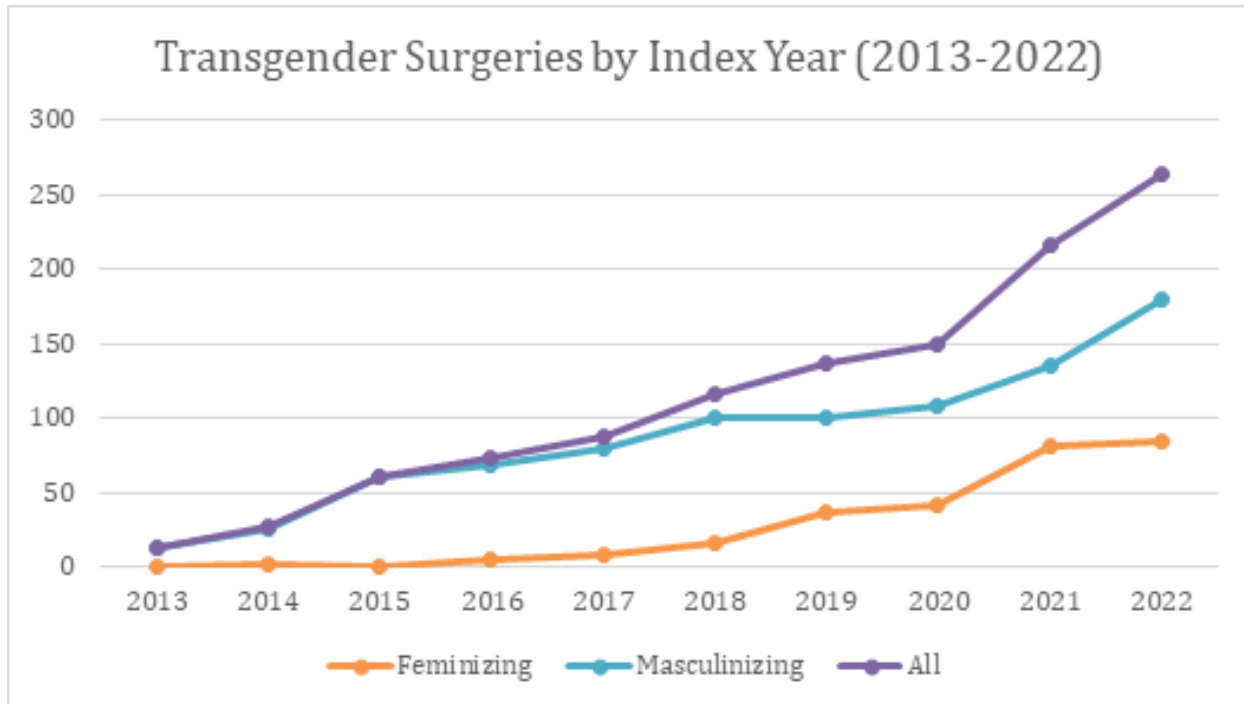

S1 Table. List of estrogen- and testosterone- based medications included



Click here to access/download  
**Supporting Information**  
S1 Table\_PLOS.docx



Supplement: pone.0302895.s002.pdf [file pone.0302895.s002.pdf]
